# Supplementary material for: Overexpression of Mtr-miR319a Contributes to Leaf Curl and Salt Stress Adaptation in Arabidopsis thaliana and Medicago truncatula
Source: MDPI journal article supplement (doi:10.3390/ijms24010429), 2022-12-27
Supplement: s1 [file s1]

**Table S1.** Primers used in this study.

| Primers                | Sequences (5'- 3')                           |
|------------------------|----------------------------------------------|
| GSP-TCP4               | CCGTCTGCAACGCAAACCGTGAACCTG                  |
| RNA adaptor            | CGACUGGAGCACGAGGACACUGACAUGGACUGAAGGAGUAGAAA |
| 5' universal<br>primer | CGACTGGAGCACGAGGACACTGA                      |
| Mtr-miR319a-F          | AAGTTCATTTCAATTTGGAGAGATTAAAATTCTGGGTTTGG    |
| Mtr-miR319a-R          | TTTAAAGAAAGATCAAAGCTCACATTGCAGACACTTTGGC     |
| Mtr-miR319a-3p         | GTGGTTGGACTGAAGGGAGCT                        |
| U6                     | CGCACAAATCGAGAAATGGTCC                       |
| Mt-TCP4-F              | ATGGGAGAAACAATACACGACC                       |
| Mt-TCP4-R              | ATGGCGAGAGTCGGAGGAAG                         |
| qMYB1-F                | GTTGGAGCTCCCTTCACTCC                         |
| qMYB1-R                | AGCACTGCTCATGCCAATCT                         |
| qMYB2-F                | TAACAGCGGCAACAAAGTGC                         |
| qMYB2-R                | AGATGTGCCCCAGCTACCTA                         |
| qCUC2-F                | GGAGCACGTGTCCTGTTTCT                         |
| qCUC2-R                | TGTTGAGACCACCACCACTG                         |
| qTCP3-F                | TCGACTGGGCTTTGATAGGC                         |
| qTCP3-R                | ACGACGCCGTTTCAGGTATT                         |
| qTCP4-F                | GCTATCGACGAACTCGCTCA                         |
| qTCP4-R                | TTTCCGGCGAAAAGCACTTG                         |
| qTCP10-F               | ATAGGGGGACCCTTCAGTCC                         |
| qTCP10-R               | CCATGGCTCTCATCCTCACC                         |
| qLOX9-F                | ACGTGCGGTCACTTTACGAT                         |
| qLOX9-R                | CCTCATCAGTCATCCACGCA                         |
| qLOX13-F               | AAGCATGGTGGACAGAAGTT                         |
| qLOX13-R               | TCTCAGCCCATGATGGTTCA                         |
| qACTIN2-F              | CAAAAGATGGCAGATGCTGAGGAT                     |
| qACTIN2-R              | CATGACACCGGTATGACGAGGTCTG                    |
